# Supplementary material for: Iron hydroxyphosphate and Sn-incorporated iron hydroxyphosphate: efficient and stable electrocatalysts for oxygen evolution reaction
Source: Royal Society of Chemistry journal article supplement (doi:10.1039/c7cy00515f), 2017-01-01
Supplement: c7cy00515f1.pdf [file c7cy00515f1.pdf]

## Electronic Supplementary Information

### Iron Hydroxyphosphate and Sn-incorporated Iron Hydroxyphosphate: Efficient and stable Electrocatalysts for Oxygen Evolution Reaction

V. Mani,<sup>#†</sup> S. Anantharaj,<sup>‡\$†</sup> Soumyaranjan Mishra,<sup>\$</sup> N. Kalaiselvi<sup>‡##</sup> and Subrata Kundu<sup>‡\$@\*</sup>

<sup>#</sup>Electrochemical Power Sources (ECPS) Division, CSIR-Central Electrochemical Research Institute (CECRI), Karaikudi-630006, Tamil Nadu, India

<sup>‡</sup>Academy of Scientific and Innovative Research, CSIR-Central Electrochemical Research Institute- Campus, New Delhi, India

<sup>\$</sup>Electrochemical Materials Science (ECMS) Division, CSIR-Central Electrochemical Research Institute (CECRI), Karaikudi-630006, Tamil Nadu, India

<sup>@</sup>Department of Materials Science and Mechanical Engineering, Texas A&M University, College Station, Texas, TX-77843, USA

<sup>†</sup>These authors have contributed equally.

\* To whom correspondence should be addressed, *E-mail:* [skundu@cecri.res.in](mailto:skundu@cecri.res.in); [kundu.subrata@gmail.com](mailto:kundu.subrata@gmail.com), Phone: (+ 91) 4565-241487, FAX: +91-4565-227651 and [kalaiselvicecri@gmail.com](mailto:kalaiselvicecri@gmail.com), Phone: (+91) 4565-241427, FAX: +91-4565-227711

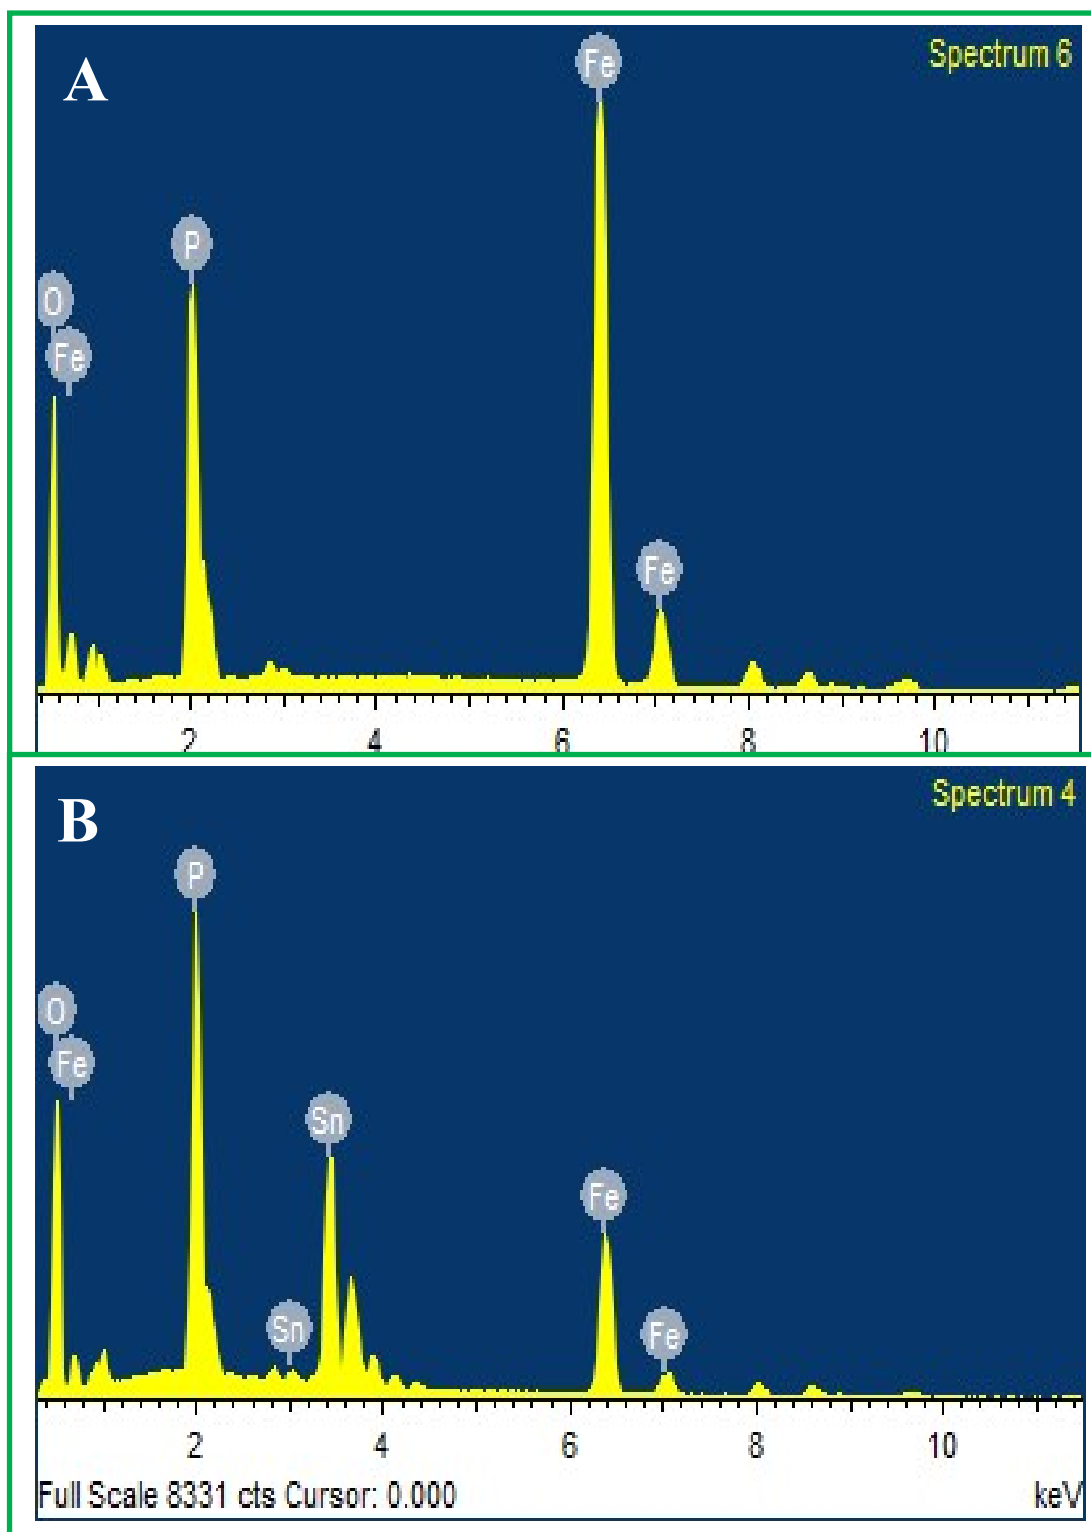

**Figure S1:** EDS results of FeHP and Sn-FeHP prepared by hydrothermal method

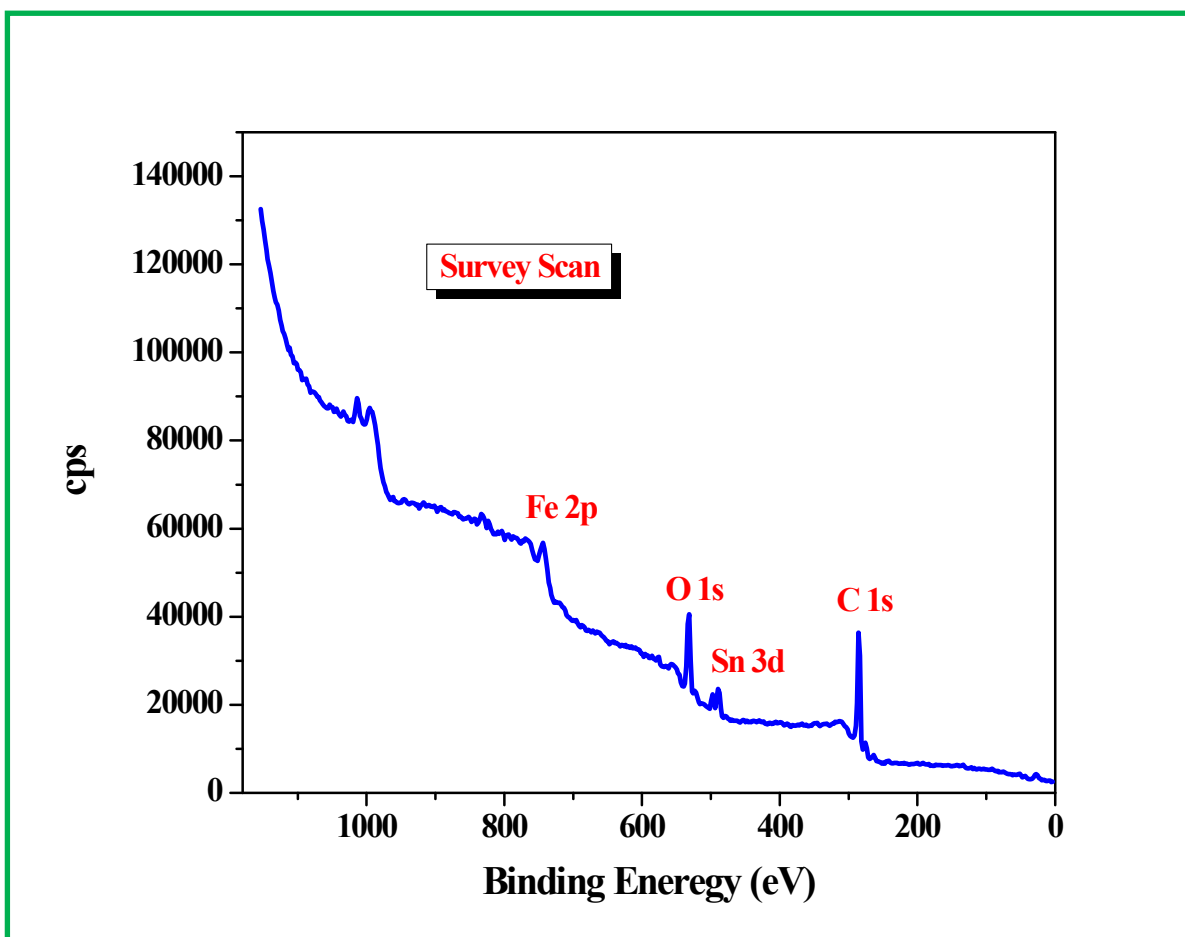

**Figure S2:** The survey scan of Sn-FeHP obtained from X-ray photoelectron spectroscopic analysis.

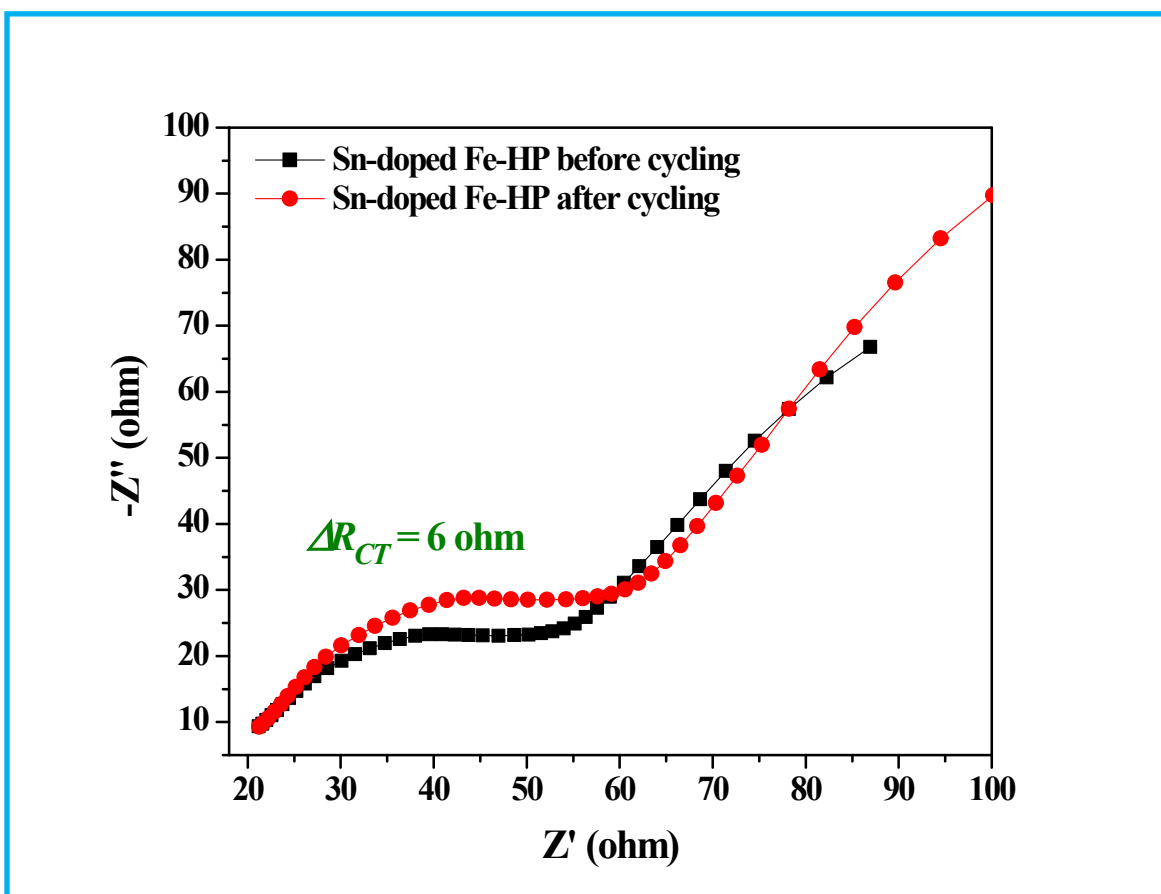

**Figure S3:** Nyquist impedance plots of Sn-FeHP before and after 500 cycles of CV in 1 M KOH solution.
